# Supplementary material for: Oleander Stem and Root Standardized Extracts Mitigate Acute Hyperglycaemia by Limiting Systemic Oxidative Stress Response in Diabetic Mice
Source: Hindawi journal article supplement (doi:10.1155/2019/7865359), 2019-01-08
Supplement: f1 [file 7865359.f1.pdf]

## SUPPLEMENTARY DATA

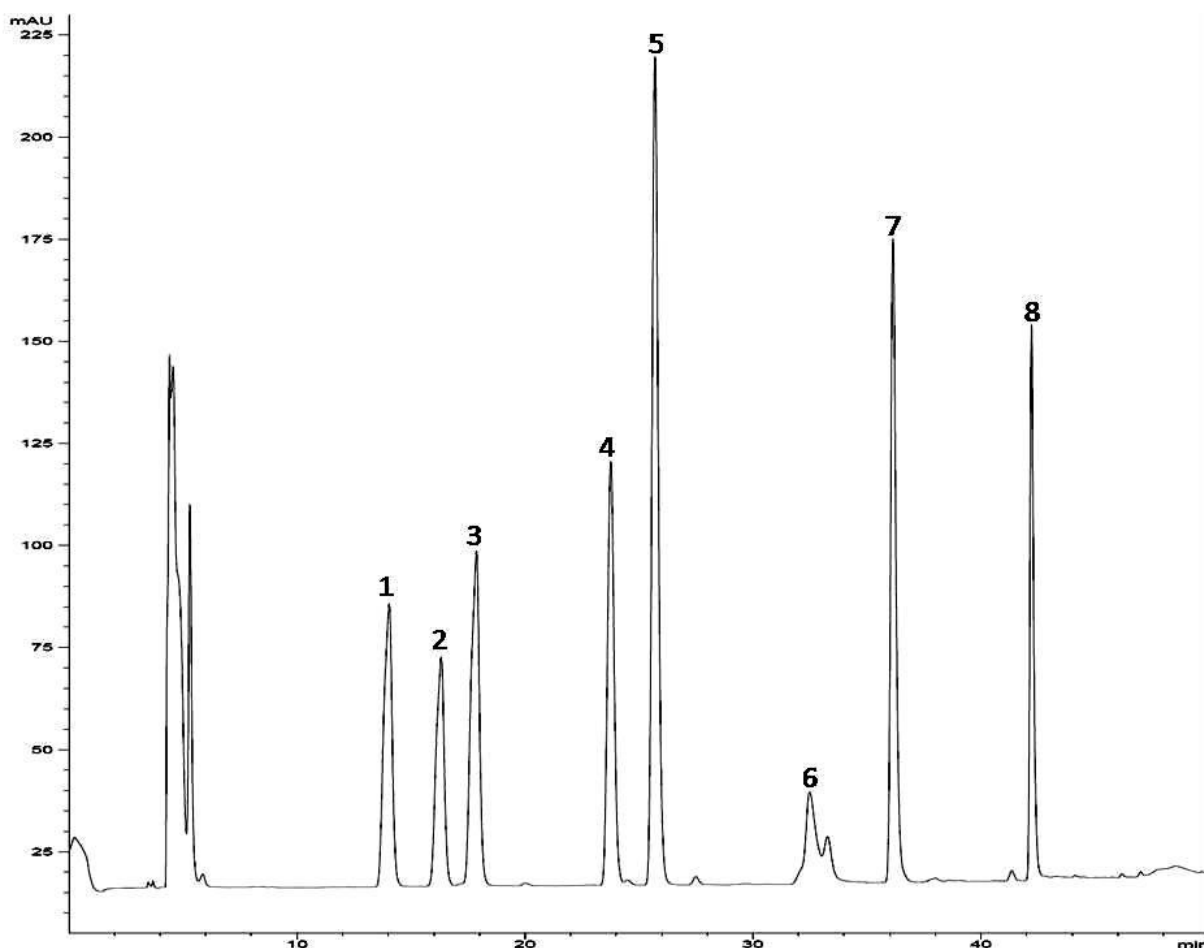

**Fig 1. HPLC chromatogram of reference standards of phenolic acids and flavonoids. 1:** 4-Hydroxy benzoic acid (RT: 14.044), **2:** Vanillic acid (RT: 16.327), **3:** Syringic acid (RT: 17.873), **4:** p-Coumaric acid (RT: 23.767), **5:** Ferulic acid (RT: 25.705), **6:** Rutin (RT: 32.489), **7:** Myricetin (RT: 36.144), **8:** Quercetin (42.217).

## Amalgamation Steps

| Step | Number of clusters | Similarity level | Distance level | Clusters joined |    | New cluster | Number of obs. in new cluster |
|------|--------------------|------------------|----------------|-----------------|----|-------------|-------------------------------|
| 1    | 29                 | 93.3428          | 0.9544         | 9               | 12 | 9           | 2                             |
| 2    | 28                 | 92.3068          | 1.1029         | 15              | 18 | 15          | 2                             |
| 3    | 27                 | 92.2266          | 1.1144         | 27              | 30 | 27          | 2                             |
| 4    | 26                 | 91.5248          | 1.2151         | 3               | 6  | 3           | 2                             |
| 5    | 25                 | 90.6388          | 1.3421         | 7               | 10 | 7           | 2                             |
| 6    | 24                 | 90.1002          | 1.4193         | 1               | 4  | 1           | 2                             |
| 7    | 23                 | 89.9885          | 1.4353         | 13              | 16 | 13          | 2                             |
| 8    | 22                 | 89.9830          | 1.4361         | 19              | 22 | 19          | 2                             |
| 9    | 21                 | 89.0523          | 1.5695         | 25              | 28 | 25          | 2                             |
| 10   | 20                 | 88.7894          | 1.6072         | 14              | 17 | 14          | 2                             |
| 11   | 19                 | 87.2350          | 1.8301         | 21              | 24 | 21          | 2                             |
| 12   | 18                 | 85.9660          | 2.0120         | 20              | 23 | 20          | 2                             |
| 13   | 17                 | 85.9200          | 2.0186         | 2               | 5  | 2           | 2                             |
| 14   | 16                 | 85.1536          | 2.1285         | 26              | 29 | 26          | 2                             |
| 15   | 15                 | 84.8969          | 2.1653         | 8               | 11 | 8           | 2                             |
| 16   | 14                 | 84.2596          | 2.2566         | 19              | 21 | 19          | 4                             |
| 17   | 13                 | 83.0872          | 2.4247         | 13              | 14 | 13          | 4                             |
| 18   | 12                 | 82.1036          | 2.5657         | 26              | 27 | 26          | 4                             |
| 19   | 11                 | 81.9009          | 2.5948         | 1               | 3  | 1           | 4                             |
| 20   | 10                 | 81.6460          | 2.6314         | 25              | 26 | 25          | 6                             |
| 21   | 9                  | 81.3119          | 2.6793         | 13              | 15 | 13          | 6                             |
| 22   | 8                  | 80.5845          | 2.7835         | 8               | 9  | 8           | 4                             |
| 23   | 7                  | 78.7545          | 3.0459         | 19              | 20 | 19          | 6                             |
| 24   | 6                  | 77.5707          | 3.2156         | 7               | 8  | 7           | 6                             |
| 25   | 5                  | 77.2848          | 3.2566         | 1               | 2  | 1           | 6                             |
| 26   | 4                  | 71.1151          | 4.1411         | 13              | 25 | 13          | 12                            |
| 27   | 3                  | 57.9775          | 6.0246         | 13              | 19 | 13          | 18                            |
| 28   | 2                  | 41.0117          | 8.4570         | 1               | 13 | 1           | 24                            |
| 29   | 1                  | 0.0000           | 14.3367        | 1               | 7  | 1           | 30                            |

## Final Partition

|          | Number of<br>observations | Within<br>cluster sum<br>of squares | Average<br>distance<br>from<br>centroid | Maximum<br>distance<br>from<br>centroid |
|----------|---------------------------|-------------------------------------|-----------------------------------------|-----------------------------------------|
| Cluster1 | 30                        | 1555583                             | 176.833                                 | 492.941                                 |
